# Supplementary material
Source: PubMed Central journal article supplement (PMC6999580)

**Article title:** Promotion of Phenolic Compounds Production in *Salvia miltiorrhiza*

Hairy Roots by Six Strains of Rhizosphere Bacteria

**Journal name:** *Engineering in life sciences*

**Author names:**

Hong You

Suijuan Yang

Lu Zhang

Xiufang Hu

Ou Li

Zhejiang Province Key Laboratory of Plant Secondary Metabolism and Regulation,  
College of Life Science, Zhejiang Sci-Tech University, Hangzhou, People's Republic  
of China

**Correspondence:** Dr. Ou Li (E-mail: [Ouli@zstu.edu.cn](mailto:Ouli@zstu.edu.cn)). Zhejiang Province Key  
Laboratory of Plant Secondary Metabolism and Regulation, College of Life Science,  
Zhejiang Sci-Tech University, Road 2, 310018, Hangzhou, People's Republic of  
China

**Additional correspondence:** Prof. Xiufang Hu (E-mail: [huxiuf@zstu.edu.cn](mailto:huxiuf@zstu.edu.cn)).  
Zhejiang Province Key Laboratory of Plant Secondary Metabolism and Regulation,  
College of Life Science, Zhejiang Sci-Tech University, Road 2, 310018, Hangzhou,  
People's Republic of China

## Materials and methods

Total RNAs were extracted from *S. miltiorrhiza* hairy roots using RNAiso™ Plus (Takara, Tokyo, Japan) according to the manufacturer's protocol. The first strand cDNA was synthesized from 500 ng total RNA with PrimeScript™ RT reagent Kit (Takara, Tokyo, Japan). Primers with the following sequences, FPAL (5'-GGCGGCGATTGAGAGCAGGA-3') and RPAL (5'-ATCAGCAGATAGGAAGAGGAGCACC-3'), F4CL (5'-TCGCCAAATACGACCTTTCC-3') and R4CL (5'-TGCTTCAGTCATCCCATACCC-3'), FC4H (5'-CCAGGAGTCCAAATAACAGAGCC-3') and RC4H (5'-GAGCCACCAAGCGTTCACCAA-3'), FTAT (5'-TTCAACGGCTACGCTCCAAC-3') and RTAT (5'-AAACGGACAATGCTATCTCAAT-3'), FHPPR (5'-GACTCCAGAAACAACCCACATT-3') and RHPPR (5'-CCCAGACGACCCTCCACAAGA-3'), FRAS (5'-CGCCCTAGTTGAGTTCTACCCTTACGC-3') and RRAS (5'-TCGGATAGGTGGTGCTCGTTTGC-3'), were used to detect the gene expression of *smPAL*, *sm4CL*, *smC4H*, *smTAT*, *smHPPR* and *smRAS*, respectively. The 18S rRNA with specific primers F18S (5'-ATGATAACTCGACGGATCGC-3') and R18S (5'-CTTGGATGTGGTAGCCGTTT-3') were used as control. Real-time PCR was performed on the Bio-Rad CFX96 system (Bio-Rad, USA) with SYBR® Premix Ex Taq™ II (Tli RNaseH Plus, Takara). The reaction mixture was incubated for 30 s at

95 °C, and for 40 cycles of 5 s at 95 °C and 30 s at 60 °C.

## Figure legends

~~Fig. S1 The way of isolating the components of fermentation broth of strain LNHR13.~~

**Fig. S12** Effects of bacteria LNHR13 on the expression level of six key enzyme genes (*smPAL*, *sm4CL*, *smC4H*, *smTAT*, *smHPPR* and *smRAS*) of RA and SAB biosynthesis pathway (phenylpropanoid pathway and the tyrosine pathway) in *S. miltiorrhiza* hairy roots at sixth day after treatment. Values are presented as mean  $\pm$  SD, n = 3. The asterisks indicate significant differences at  $P < 0.05$ ,  $P < 0.01$ , and  $P < 0.001$ , marked as \*, \*\*, and \*\*\*, respectively.

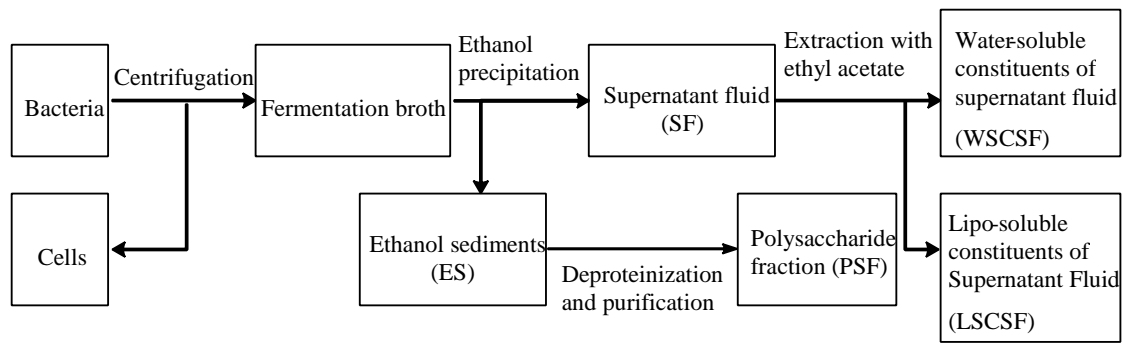

|

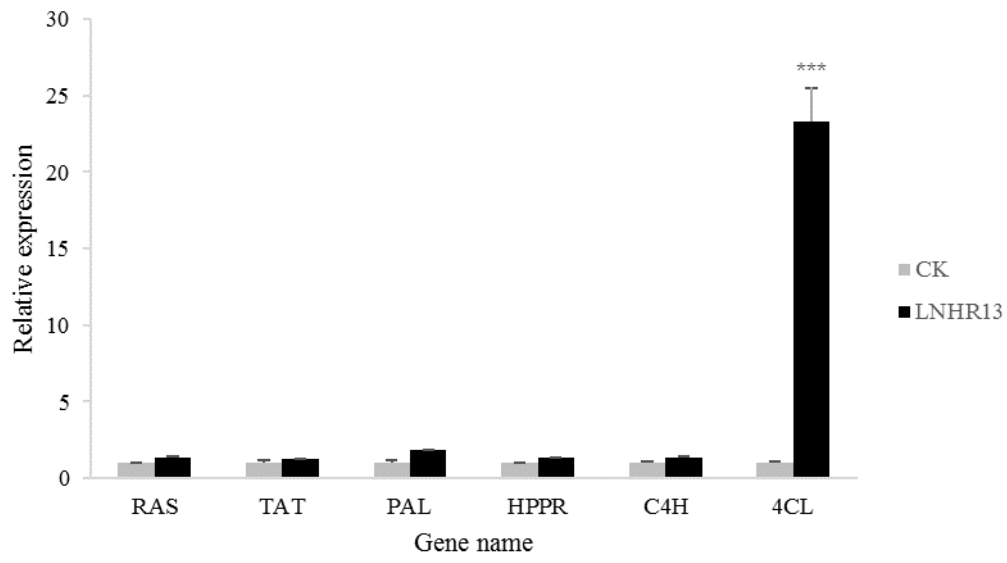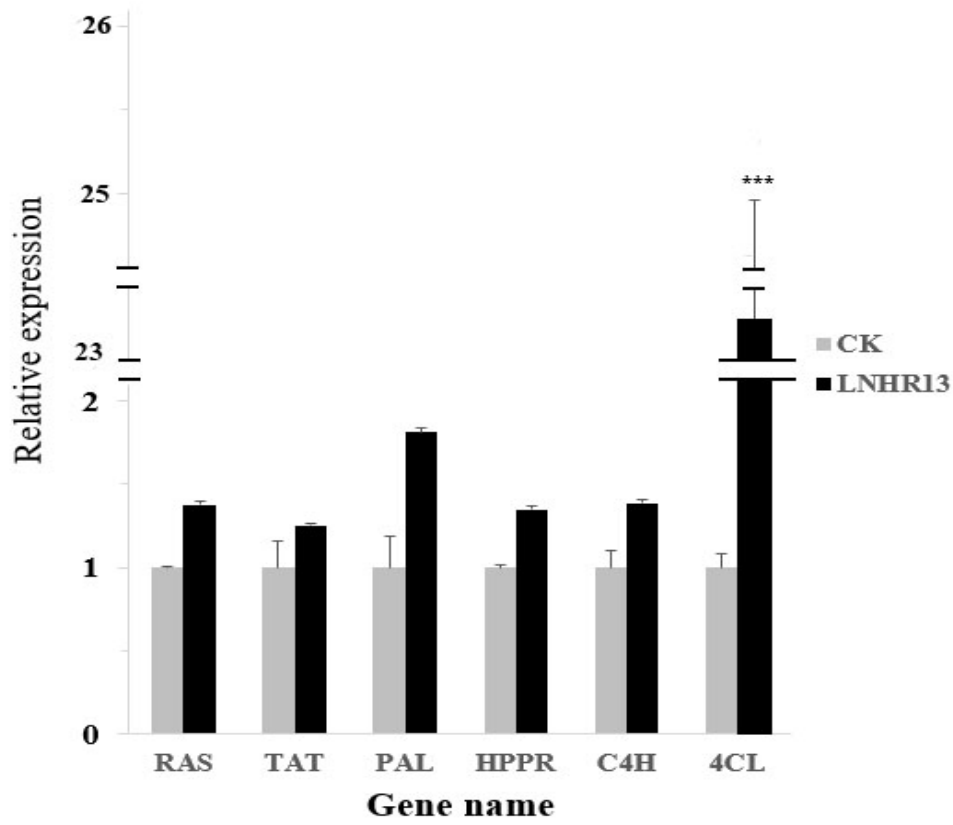

Supplement: ELSC-18-160-s001.pdf [file ELSC-18-160-s001.pdf]
